# Supplementary material for: Selective lithium extraction from brines by chemical reaction with battery materials
Source: Royal Society of Chemistry journal article supplement (doi:10.1039/c4ta01101e), 2014-01-01
Supplement: c4ta01101e1.pdf [file c4ta01101e1.pdf]

Supporting information

## EXPERIMENTAL METHODS

### LiFePO<sub>4</sub> starting material

The experiments were performed with battery grade LiFePO<sub>4</sub> supplied by Tantung. According to the technical data sheet, this material has a specific surface area of 11.66 m<sup>2</sup>/g and an average particle size of 2.35 μm (D<sub>50</sub>=2.35 μm, D<sub>90</sub>=4.63 μm, D<sub>10</sub>=1.30 μm). The material is carbon coated, but the final carbon content is < 3%. According to the specifications, this material provides a capacity of 152 mAh/g at C/5 and of 140 mAh/g at 1C. In our measurements, we obtain values of capacity around 5-10% lower, which we attribute to the fact that our method of electrode preparation and cell design is not optimal. However, this difference in capacity is reasonably small. In addition, in this work, we use the electrochemical test in order to characterize the Li content in Li<sub>x</sub>FePO<sub>4</sub> samples and in order to compare the performance of LiFePO<sub>4</sub> samples prepared following different procedures. LiFePO<sub>4</sub> acts here as an internal standard and therefore the results are corrected from the experimental inaccuracies associated to cell design and electrode preparation.

### Electrode preparation and electrochemical tests

LiFePO<sub>4</sub> composite electrodes were prepared as follows. 75%wt of powder sample (LiFePO<sub>4</sub>), 20%wt of acetylene carbon (Chevron), and 5%wt polytetrafluoroethylene (PTFE, DuPont) were mixed, grinded, and pressed to ~100 μm thick sheets. The electrodes were cut in discs of 1 cm diameter, which were dried under vacuum at 120°C for approximately 18 hours. The electrochemical tests were performed in Swagelok® type cells, which were dried at 80°C overnight. The cells were assembled in an argon glovebox (< 1 ppm water content, < 10 ppm oxygen content). The cells were assembled with a sample pellet, followed by a 1.4 cm-diameter separator (glass microfiber filters; Whatman®) soaked with 8 drops of LP30 (1 M LiPF<sub>6</sub> in EC:DMC, BASF) and a 1 cm-diameter lithium disc. Galvanostatic cycling with potential limitation (GCPL) measurements were done at 25°C with a BMP3 multichannel potentiostat.

### Digestion of samples for inductive coupled plasma (ICP) analysis

0.1 g of each powder sample was digested in 2 ml of a solution of 20%wt of HCl (Analar Normapur, BDH) and 20% wt HNO<sub>3</sub> (Aristar, BDH) in deionized water. The mixture was stirred at ~60°C for approximately 2 hours. In order to verify that the entire sample has been digested, the mixture was filtered with a Gooch funnel. The filtered solid was dried and weighted. The solid accounted for less than 5% of the sample weight, and it was tentatively ascribed to the carbon content in the sample.

### Chemical delithiation of LiFePO<sub>4</sub>

The procedure for delithiation of LiFePO<sub>4</sub> followed the work by Raman et al. (C. V. Ramana, A. Mauger, F. Gendron, C. M. Julien, and K. Zaghib, *J. Power Sources*, 2009, 187, 555–564). Lithium iron phosphate (LiFePO<sub>4</sub>, TATUNG) and potassium persulfate (K<sub>2</sub>S<sub>2</sub>O<sub>8</sub>, Sigma-Aldrich ≥99.0 %) were mixed in a molar ratio of K<sub>2</sub>S<sub>2</sub>O<sub>8</sub> : LiFePO<sub>4</sub> equal to 1:2. 11.7 g of LiFePO<sub>4</sub> and 10 g of K<sub>2</sub>S<sub>2</sub>O<sub>8</sub> were mixed in 370 ml of deionized water and the reaction was held for 24 hours at room temperature under stirring. The precipitate was washed, filtered, and dried at 80°C for 24 hours. Under these conditions, full delithiation of LiFePO<sub>4</sub>, forming

FePO<sub>4</sub>, was confirmed by X-ray diffraction (XRD), electrochemical tests and ICP analysis.

## Chemical lithiation of FePO<sub>4</sub>

### 1. Characterization of the kinetics of lithiation of FePO<sub>4</sub>

The experimental procedure followed in the study of the kinetics of chemical lithiation of FePO<sub>4</sub> is as follows. Delithiated FePO<sub>4</sub> (prepared as above explained) was mixed with lithium sulphate (Li<sub>2</sub>SO<sub>4</sub>, Sigma-Aldrich, ≥98.5 %) and sodium thiosulphate (Na<sub>2</sub>S<sub>2</sub>O<sub>3</sub>, Sigma-Aldrich, ≥99.5 %). The stoichiometry of the lithiation reaction is as follows:

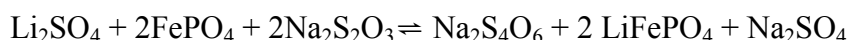

Our experiments were done with a ratio of Li<sub>2</sub>SO<sub>4</sub>: Na<sub>2</sub>S<sub>2</sub>O<sub>3</sub>: FePO<sub>4</sub> equal to 2:4:1. Therefore, these experiments are performed in the presence of an excess of reducing agent and lithium salt. This was done in order to guarantee that the lithiation of FePO<sub>4</sub> will not be coupled to major changes in the concentration thiosulphate or lithium cations in solution. The mixture of Li<sub>2</sub>SO<sub>4</sub> and Na<sub>2</sub>S<sub>2</sub>O<sub>3</sub> were first dissolved in deionized water. FePO<sub>4</sub> was then added into the solution and stirred at room temperature as time was started. Precipitated samples were taken at 5, 20, 60, 120, 240, and 600 minutes, respectively. The samples were washed, filtered, and dried at 80°C for 24 hours. The powder samples were examined by XRD, electrochemical measurements and ICP analysis.

### 2. Study of the effect of the effect of the lithium to sodium concentration ratio.

The chemical lithiation of FePO<sub>4</sub> in solutions with different ratio of concentrations of lithium and sodium cations was studied as follows. Delithiated FePO<sub>4</sub> (prepared as above explained) was mixed with Li<sub>2</sub>SO<sub>4</sub> (Sigma-Aldrich, ≥98.5 %) or LiCl (Sigma-Aldrich, ≥99.0 %), NaCl (Sigma-Aldrich, ≥99.0 %) and Na<sub>2</sub>S<sub>2</sub>O<sub>3</sub> (Sigma-Aldrich, ≥99.5 %). In all these experiments, [Na<sub>2</sub>S<sub>2</sub>O<sub>3</sub>]=0.3M. The molar ratio of Li<sup>+</sup>: Na<sup>+</sup>: S<sub>2</sub>O<sub>3</sub><sup>2-</sup>: FePO<sub>4</sub> is given in the table below. Therefore, all these experiments were performed in the presence of an excess of reducing agent and lithium salt. All concentrations are given in the table below.

| [Li <sup>+</sup> ] : [Na <sup>+</sup> ] : [S <sub>2</sub> O <sub>3</sub> <sup>2-</sup> ] : [FePO <sub>4</sub> ] | Chemicals                                     | Amount/ g | Deionized water / L |
|-----------------------------------------------------------------------------------------------------------------|-----------------------------------------------|-----------|---------------------|
| 1 : 10 : 5 : 0.5                                                                                                | LiCl                                          | 0.51      | 0.201               |
|                                                                                                                 | Na <sub>2</sub> S <sub>2</sub> O <sub>3</sub> | 15.0      |                     |
|                                                                                                                 | FePO <sub>4</sub>                             | 0.91      |                     |
| 1 : 50 : 5 : 0.5                                                                                                | LiCl                                          | 0.51      | 0.201               |
|                                                                                                                 | Na <sub>2</sub> S <sub>2</sub> O <sub>3</sub> | 15.0      |                     |
|                                                                                                                 | FePO <sub>4</sub>                             | 0.91      |                     |
|                                                                                                                 | NaCl                                          | 28.6      |                     |

|                   |                                               |      |       |
|-------------------|-----------------------------------------------|------|-------|
| 1 : 100 : 5 : 0.5 | LiCl                                          | 0.51 | 0.201 |
|                   | Na <sub>2</sub> S <sub>2</sub> O <sub>3</sub> | 15.0 |       |
|                   | FePO <sub>4</sub>                             | 0.91 |       |
|                   | NaCl                                          | 63.6 |       |

### 3. Study of the lithiation of FePO<sub>4</sub> in artificial brines

The chemical lithiation of FePO<sub>4</sub> was also studied in artificial brines. The composition of the natural brines is very varied. In this work, we have prepared two types of artificial brines whose composition is the same as two typical brines found in the lithium reserve in Central Altiplano, Bolivia (F. Risacher and B. Fritz, *Chem. Geol.*, 1991, 90, 211–231). We performed these experiments in the presence of [Na<sub>2</sub>S<sub>2</sub>O<sub>3</sub>]=0.3M. The molar ratio of Li<sup>+</sup>: Na<sup>+</sup>: S<sub>2</sub>O<sub>3</sub><sup>2-</sup>: FePO<sub>4</sub> is given in the table below. Therefore, all these experiments were performed in the presence of an excess of reducing agent and lithium salt. All concentrations are given in the table below.

| [Li <sup>+</sup> ] : [Na <sup>+</sup> ] : [S <sub>2</sub> O <sub>3</sub> <sup>2-</sup> ] : [FePO <sub>4</sub> ] | Chemicals                                     | Amount/g | Deionized water / L |
|-----------------------------------------------------------------------------------------------------------------|-----------------------------------------------|----------|---------------------|
| 1 : 76.6 : 5 : 0.5                                                                                              | LiCl                                          | 0.34     | 0.134               |
|                                                                                                                 | Na <sub>2</sub> S <sub>2</sub> O <sub>3</sub> | 10.0     |                     |
|                                                                                                                 | FePO <sub>4</sub>                             | 0.61     |                     |
|                                                                                                                 | NaCl                                          | 31.4     |                     |
|                                                                                                                 | KCl                                           | 2.00     |                     |
|                                                                                                                 | MgCl <sub>2</sub>                             | 8.19     |                     |
| 1 : 15 : 1.5 : 0.5                                                                                              | LiCl                                          | 0.57     | 0.067               |
|                                                                                                                 | Na <sub>2</sub> S <sub>2</sub> O <sub>3</sub> | 5.00     |                     |
|                                                                                                                 | FePO <sub>4</sub>                             | 1.01     |                     |
|                                                                                                                 | NaCl                                          | 9.42     |                     |
|                                                                                                                 | K <sub>2</sub> SO <sub>4</sub>                | 3.51     |                     |
|                                                                                                                 | MgCl <sub>2</sub>                             | 17.8     |                     |

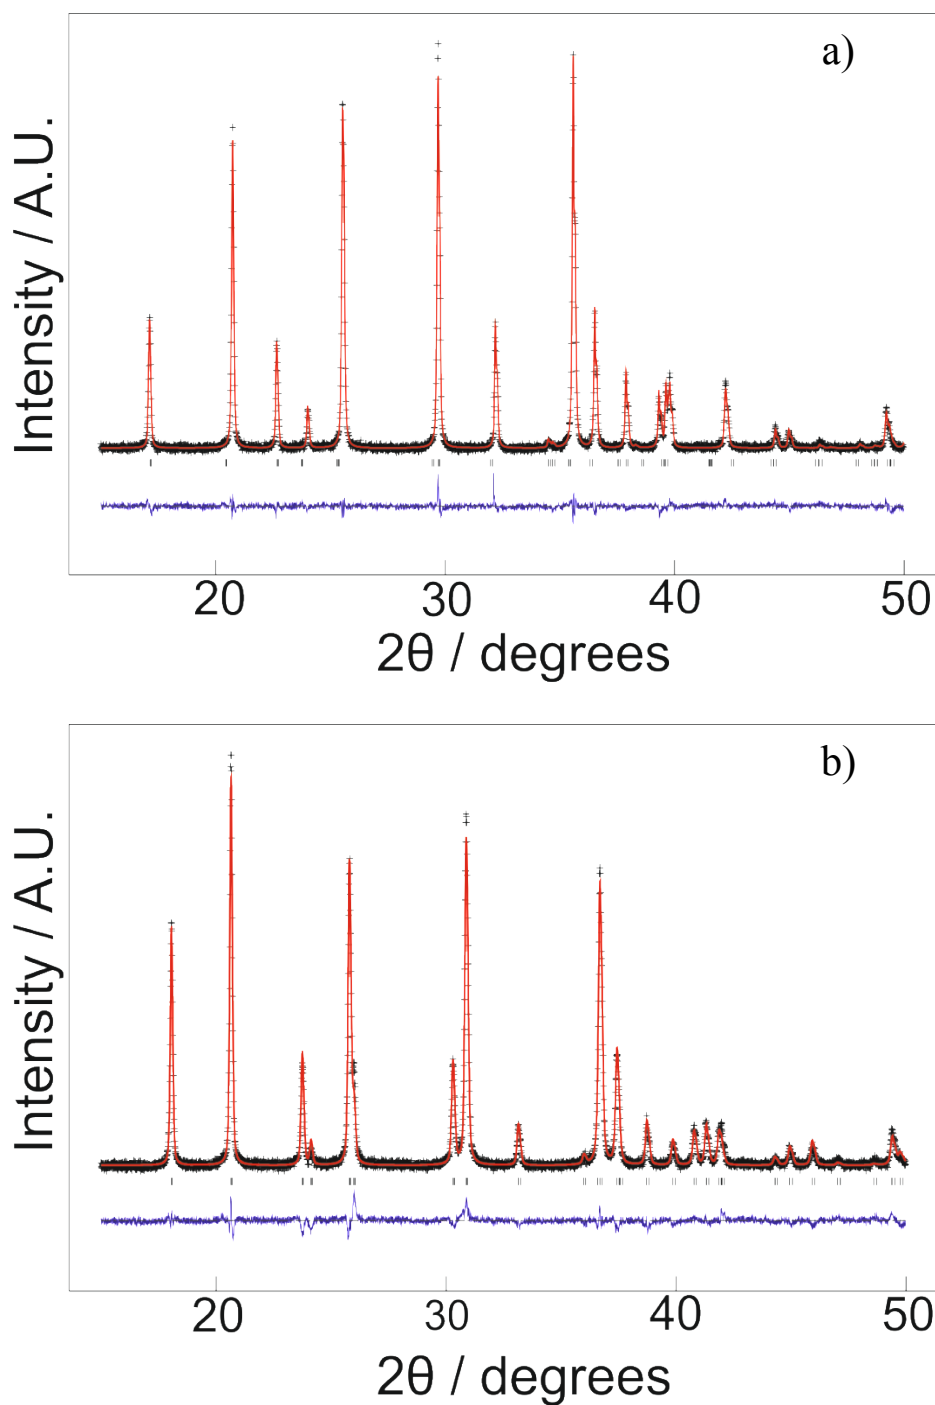

Fig S1. Fit to XRD data of a)  $\text{LiFePO}_4$  (Tatung) and b)  $\text{FePO}_4$ , where the latter was prepared by chemical delithiation of  $\text{LiFePO}_4$  using a 6-fold molar excess of  $0.1\text{M K}_2\text{S}_2\text{O}_8$  for 24 hours. Crosses mark the data points, red line is the fit and blue line is the difference. Tick marks show the allowed reflection positions for

a)  $\text{LiFePO}_4$ :  $R_{\text{wp}}$  1.3%,  $R_{\text{p}}$  1.0% and lattice parameter  $a = 10.3154(2)$ ,  $b = 5.99938(12)$ ,  $c = 4.6889(1)$  Å

b)  $\text{FePO}_4$ :  $R_{\text{wp}}$  1.5%,  $R_{\text{p}}$  1.1% and lattice parameter  $a = 9.8173(3)$ ,  $b = 5.7879(1)$ ,  $c = 4.7815(2)$  Å

$R_{\text{p}}$  and  $R_{\text{wp}}$  are the profile and weighted profile reliability factors as defined in the GSAS manual, reference A. C. Larson and R. B. von Dreele, General Structure Analysis System, Los Alamos National Laboratory report LAUR 86-748 (2004).

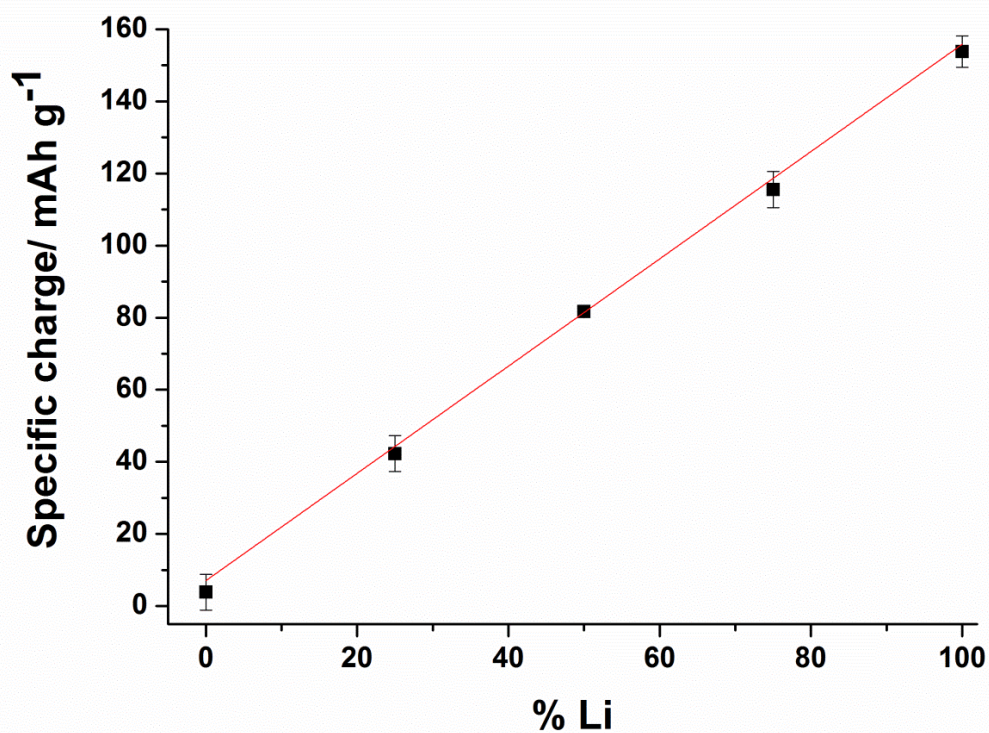

Fig S2. Validation curve for the estimation of the lithium molar content of  $\text{Li}_x\text{FePO}_4$  samples by potentiometric titration. The results presented in this graph were obtained by mixing weighted amounts of  $\text{FePO}_4$  and  $\text{LiFePO}_4$ . The powder was then grounded with PTFE and acetylene black in order to prepare electrodes that were then cycled vs. lithium counter electrodes in a cell containing LP30 electrolyte.

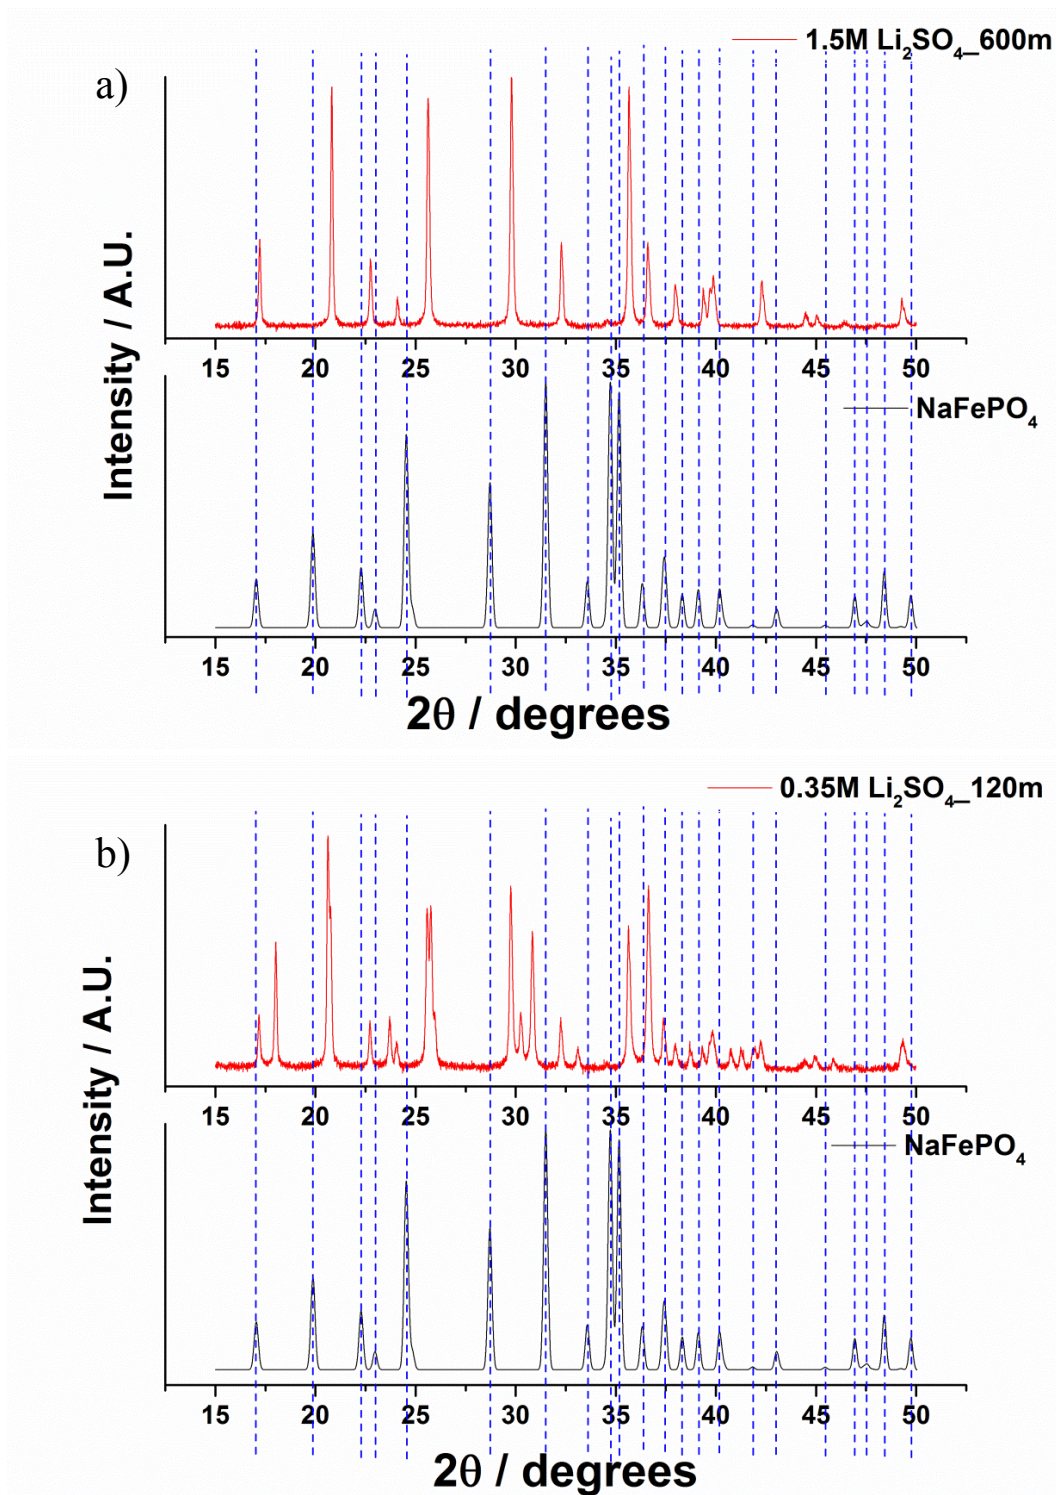

Fig. S3. Comparison of the XRD spectrum of  $\text{Li}_x\text{FePO}_4$  samples (red curves) with literature database for olivine  $\text{NaFePO}_4$  (black curves, from: P. Moreau, D. Guyomard, J. Gaubicher and F. Boucher, *Chemistry of Materials*, 2010, 22, 4126-4128). To help with the comparison, blue vertical lines have been drawn in the reflection positions of olivine  $\text{NaFePO}_4$ . a) totally lithiated  $\text{LiFePO}_4$  sample obtained by lithiation of  $\text{FePO}_4$  with  $3\text{M Na}_2\text{S}_2\text{O}_3 + 1.5\text{M Li}_2\text{SO}_4$  for 10 hours, b) partially lithiated  $\text{Li}_x\text{FePO}_4$  sample obtained by lithiation of  $\text{FePO}_4$  with  $0.7\text{M Na}_2\text{S}_2\text{O}_3 + 0.35\text{M Li}_2\text{SO}_4$  for 120 minutes.

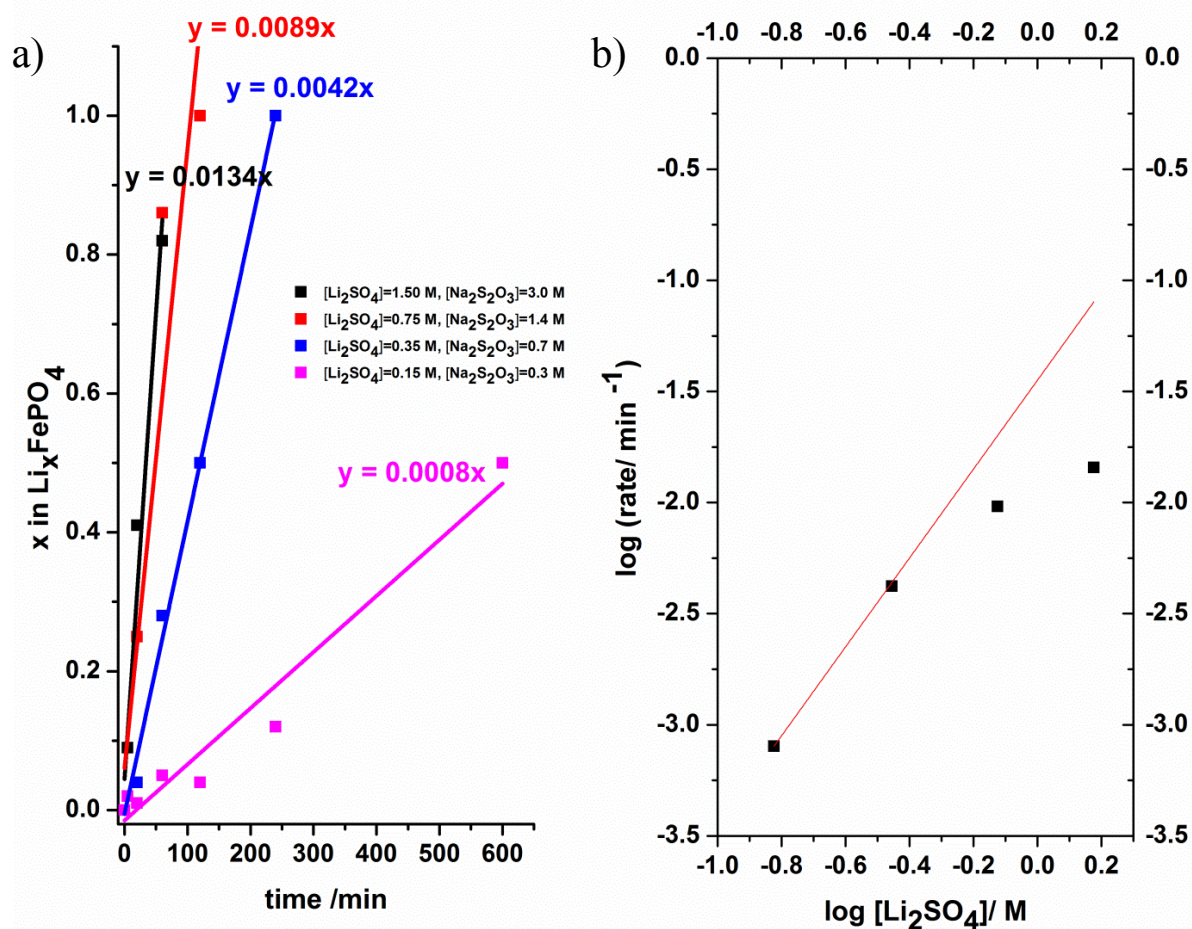

Fig S4. Analysis of the kinetics of lithiation of  $\text{FePO}_4$  with a 4-fold excess of reagent ( $\text{Li}_2\text{SO}_4 + \text{Na}_2\text{S}_2\text{O}_3$  in molar ratio 1:2)

In Fig S4a, the initial rate is approximately constant in all cases, showing little decline until saturation of the solid phase; i.e.  $\text{LiFePO}_4$ , is approached. The rate is less dependent on the solution concentrations between 0.75 M and 1.5 M  $\text{Li}_2\text{SO}_4$  where rate limitations due to solid state processes may be envisaged. However, an important effect of solution dilution appears between 0.35 M and 0.15 M  $\text{Li}_2\text{SO}_4$ , where the rate law approximates to second order in the overall concentration with a rate constant of about  $0.03\text{ min}^{-1}\text{ M}^{-2}$  as shown in Fig S4b. The origin of this second order dependence may be simply a reaction that is first order in each of the reactants (thiosulfate and lithium ion).

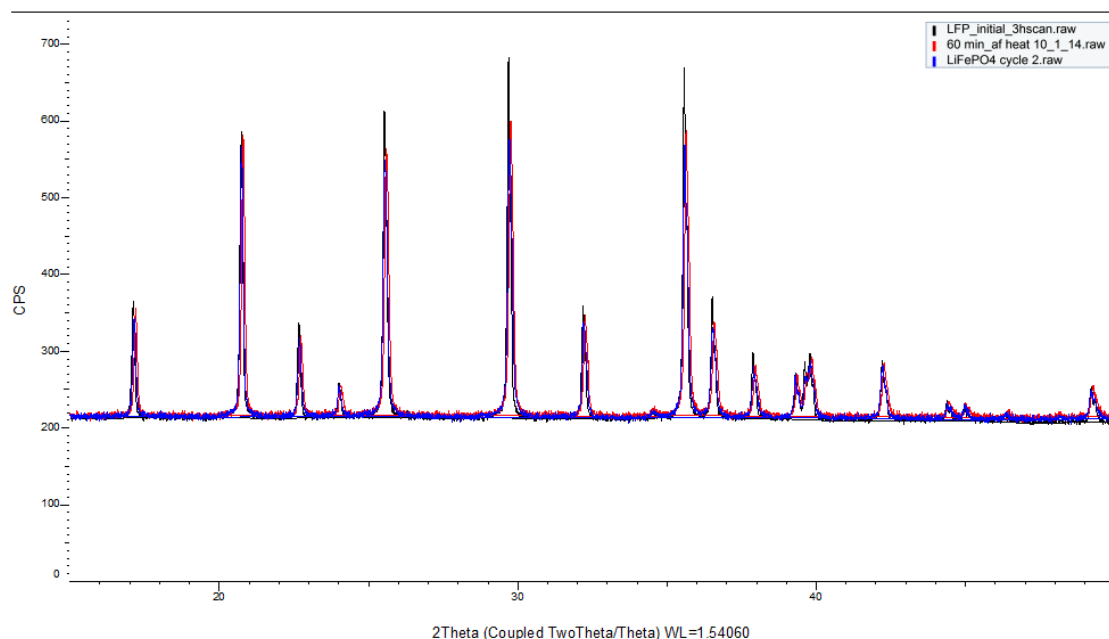

Fig. S5. Comparison of XRD pattern measured with the  $\text{LiFePO}_4$  as received (black curve), after one cycle of delithiation + lithiation (red curve), and after 2 cycles of delithiation + lithiation (blue curve). Conditions for delithiation: 0.1M  $\text{K}_2\text{S}_2\text{O}_8$  + 31mg of  $\text{LiFePO}_4$  per ml of solution. Conditions for lithiation: 1.5M  $\text{Li}_2\text{SO}_4$  + 3M  $\text{Na}_2\text{S}_2\text{O}_3$  + 113 mg of  $\text{FePO}_4$  per ml of solution.

The following structural parameters are obtained after Rietveld refinement of the data:

| compound        | a/ Å         | b/ Å        | c/ Å      | $R_{\text{wp}}$ | $R_{\text{p}}$ |
|-----------------|--------------|-------------|-----------|-----------------|----------------|
| Initial         | 10.3154(2)   | 5.99938(12) | 4.6889(1) | 1.27%           | 0.95%          |
| After one cycle | 10.3150(2)   | 6.00065(13) | 4.6924(1) | 1.30%           | 1%             |
| After 2 cycles  | 10.31519(23) | 5.99976(13) | 4.6938(1) | 1.30%           | 1.01%          |



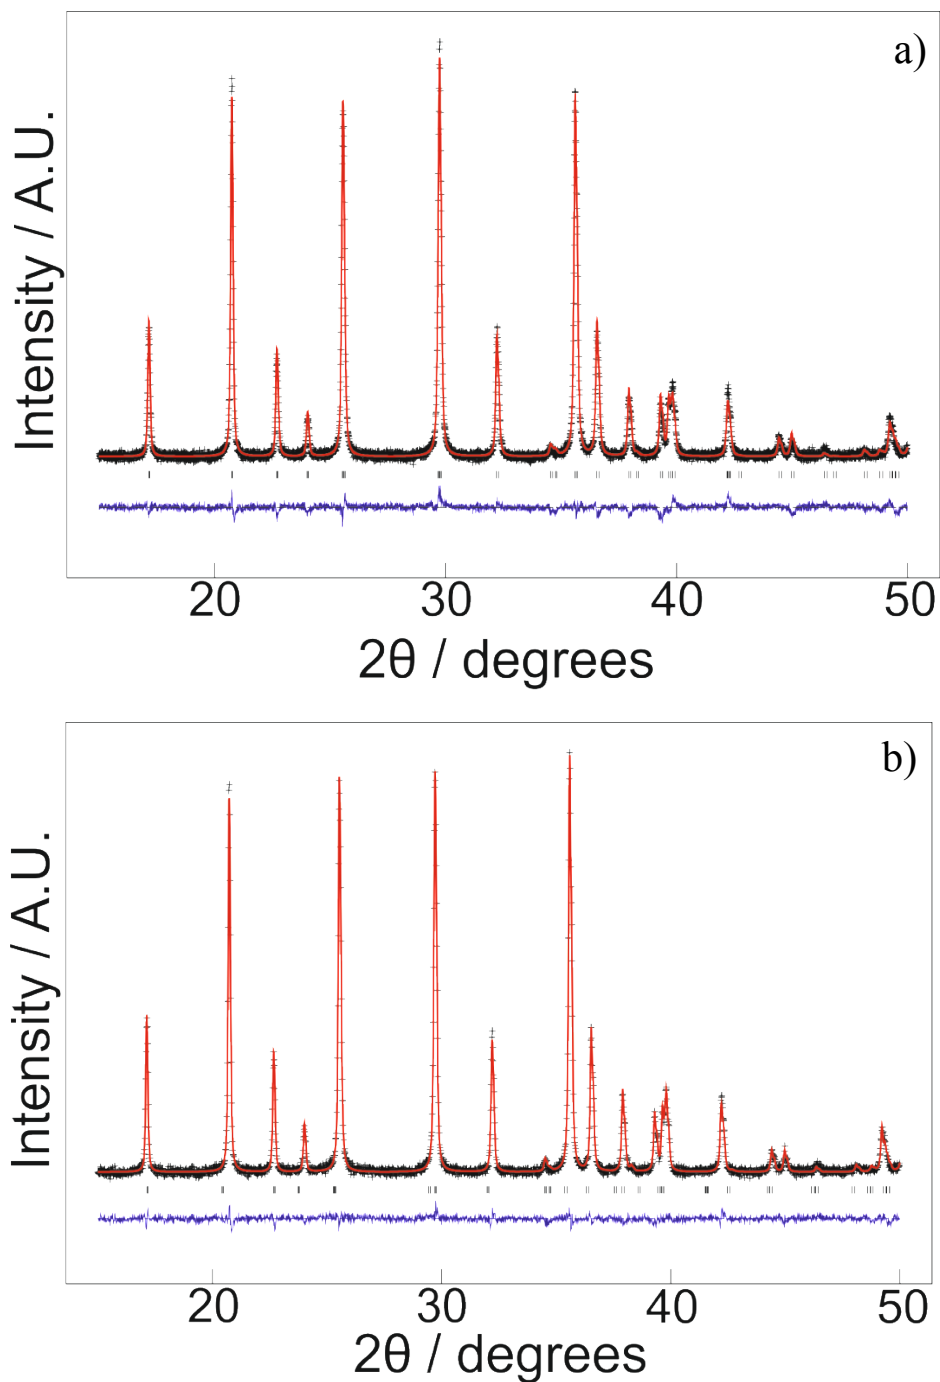

Fig S6. Fit to XRD data for LiFePO<sub>4</sub> prepared by chemical lithiation of FePO<sub>4</sub> in natural brines. Crosses mark the data points, red line is the fit and blue line is the difference. The tick marks show the allowed reflection positions for LiFePO<sub>4</sub>.

a) 0.6g FePO<sub>4</sub> with [Na<sub>2</sub>S<sub>2</sub>O<sub>3</sub>]=0.3M + [LiCl]=0.06M + [NaCl]=4M + [KCl]=0.2M + [MgCl<sub>2</sub>]=0.3M for 24 hours; R<sub>wp</sub> 1.3%, R<sub>p</sub> 1.0% and lattice parameter a = 10.3080(2), b = 5.99556(13), c = 4.69349(14) Å

b) 1g FePO<sub>4</sub> with [Na<sub>2</sub>S<sub>2</sub>O<sub>3</sub>]=0.3M + [LiCl]=0.2M + [NaCl]=2.4M + [K<sub>2</sub>SO<sub>4</sub>]=0.3M + [MgCl<sub>2</sub>]=1.3M for 24 hours; R<sub>wp</sub> 1.1%, R<sub>p</sub> 0.9% and lattice parameter a = 10.31288(24), b = 5.9981(1), c = 4.6927(1) Å

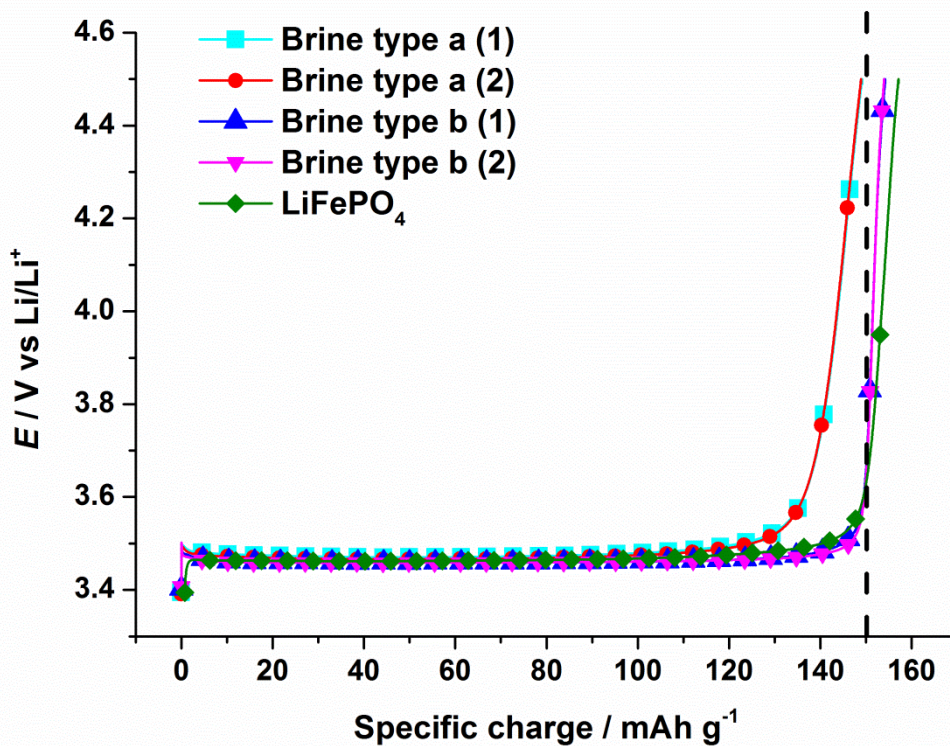

Fig S7. Electrochemical data of LiFePO<sub>4</sub> prepared by chemical lithiation of FePO<sub>4</sub> in natural brines. a) 0.6g FePO<sub>4</sub> with [Na<sub>2</sub>S<sub>2</sub>O<sub>3</sub>]=0.3M + [LiCl]=0.06M + [NaCl]=4M + [KCl]=0.2M + [MgCl<sub>2</sub>]=0.3M; b) 1g FePO<sub>4</sub> with [Na<sub>2</sub>S<sub>2</sub>O<sub>3</sub>]=0.3M + [LiCl]=0.2M + [NaCl]=2.4M + [K<sub>2</sub>SO<sub>4</sub>]=0.3M + [MgCl<sub>2</sub>]=1.3M. The results obtained with LiFePO<sub>4</sub> (Tantung) are also included in the graph for the sake of comparison.
